# Supplementary material
Source: PubMed Central journal article supplement (PMC4825585)
Supplement: kccy-14-20-1084447-s001.pdf [file kccy-14-20-1084447-s001.pdf]

**Fig. S1**

**A**

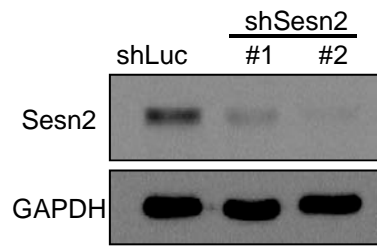

**B**

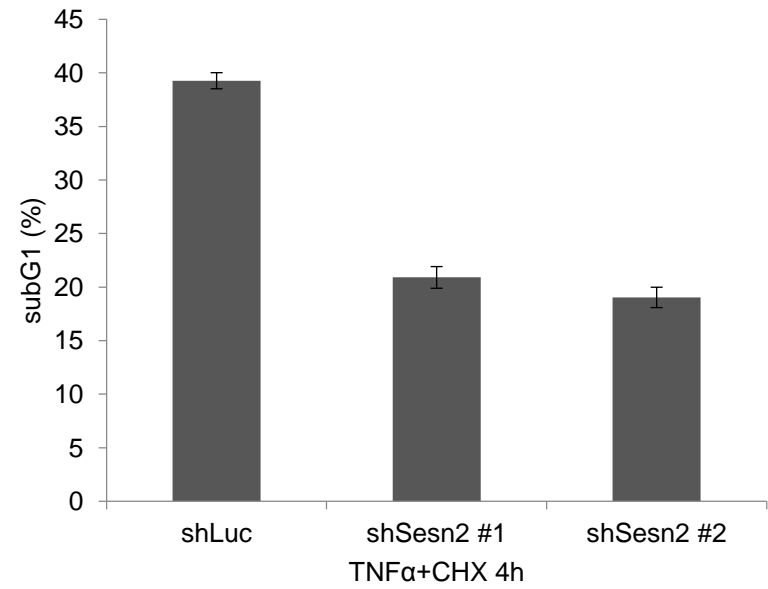

**C**

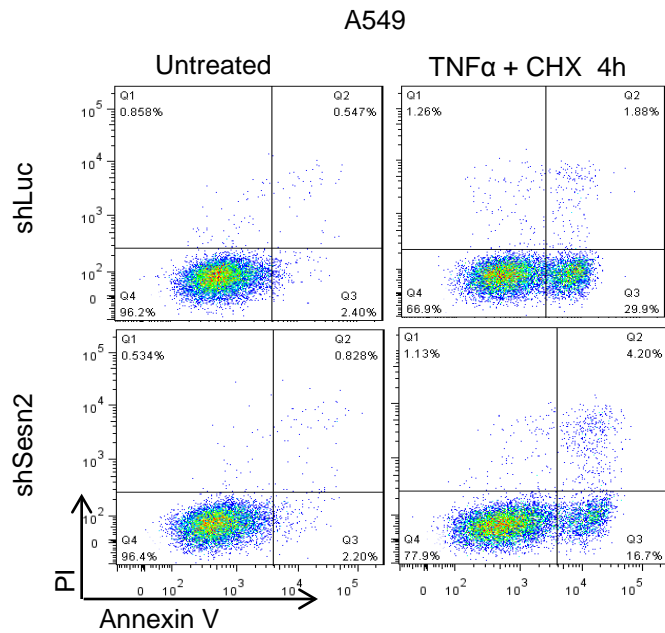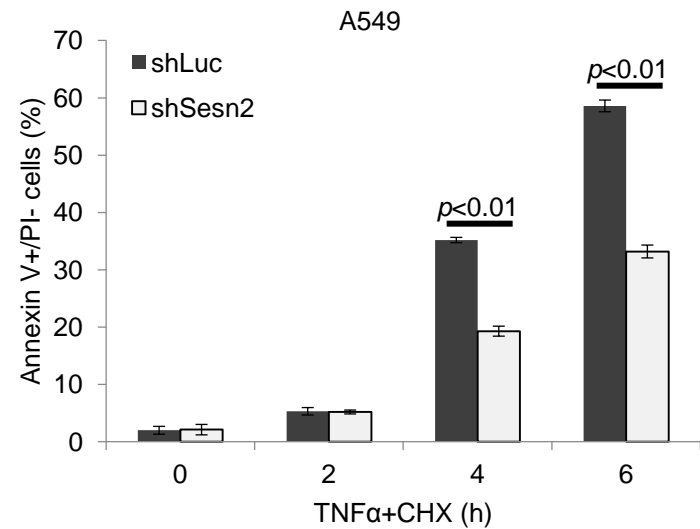

**Fig. S2**

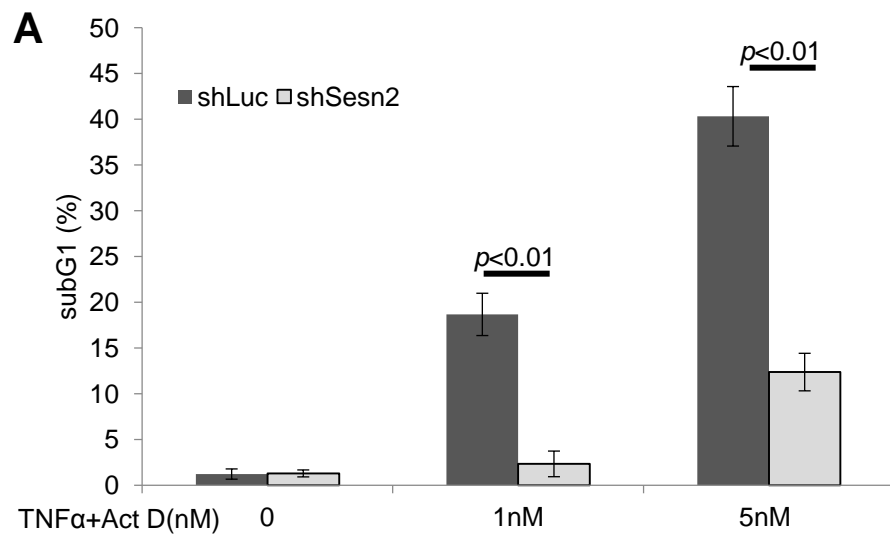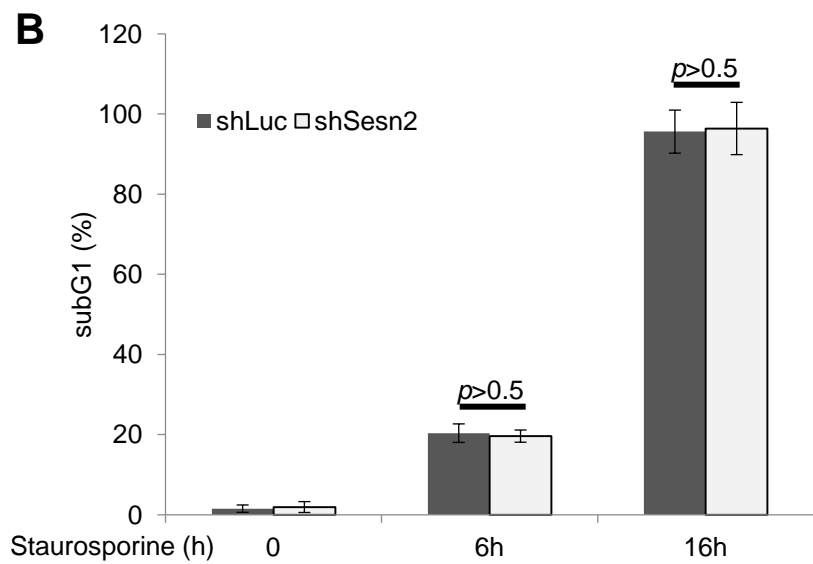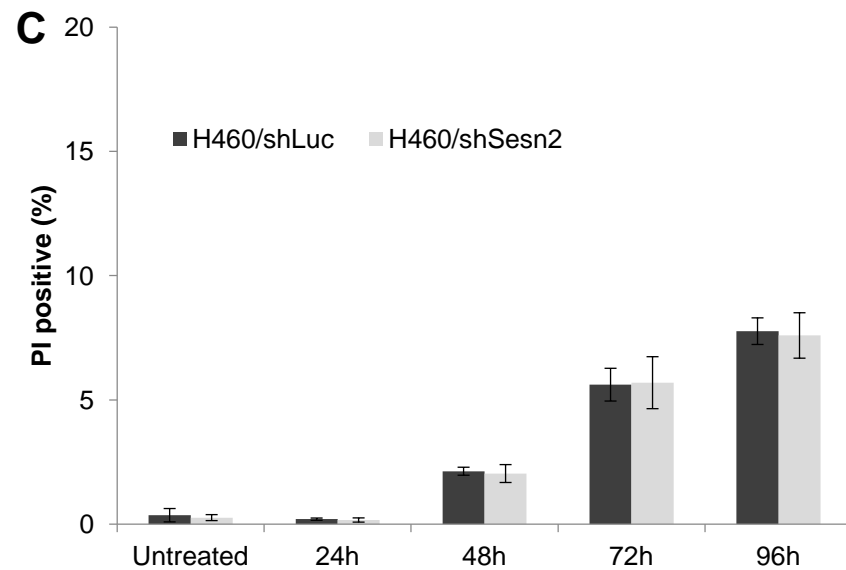

**Fig. S3**

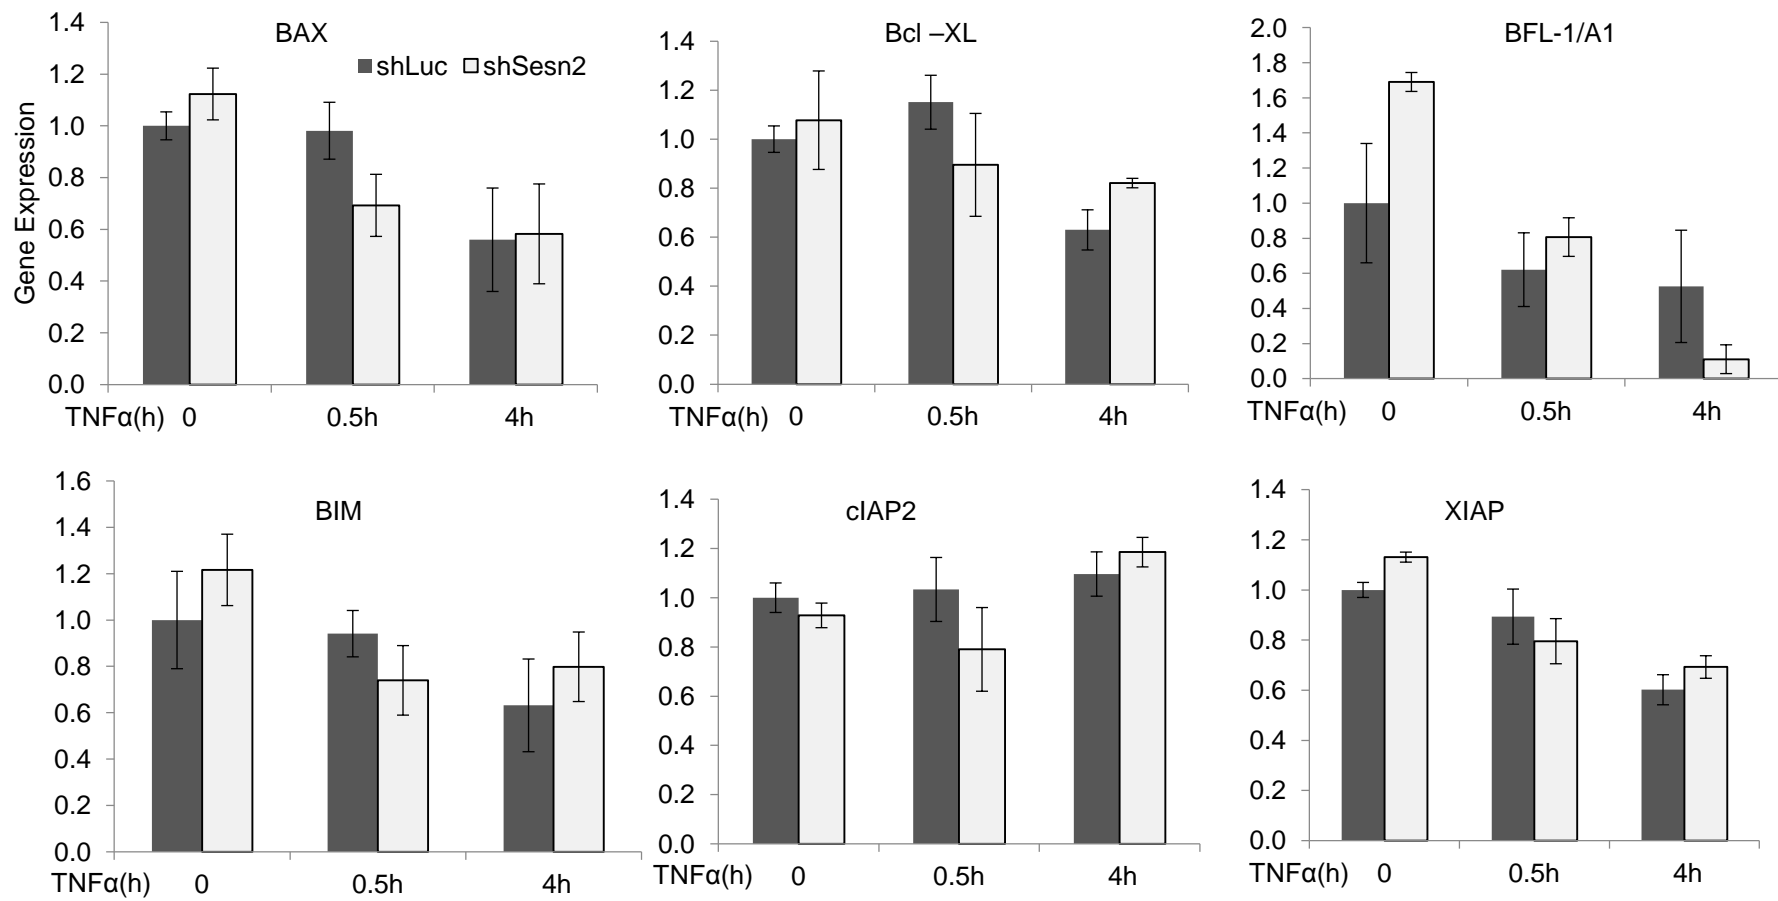

**Fig. S4**

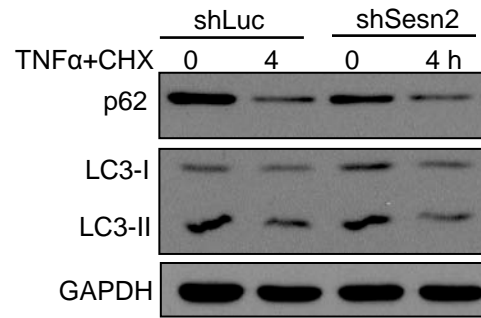

**Fig. S5**

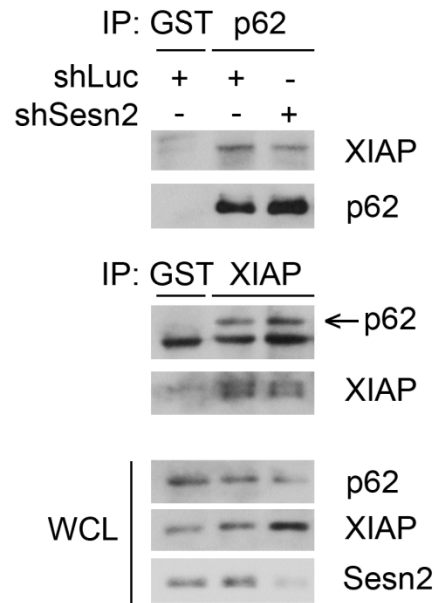

**Supplemental Information**

**Sestrin2 facilitates death receptor-induced apoptosis in lung adenocarcinoma cells through regulation of XIAP degradation**

**Boxiao Ding, Anita Parmigiani, Yang Chen, and Andrei V. Budanov**

## Supplementary Figures:

**Figure S1: Sesn2 supports TNF $\alpha$ -induced cell death.** (A) shSesn2-1 and shSesn2-2 have similar effect on Sesn2 silencing. H460 cells were infected with shSesn2-1 and shSesn2-2 lentiviral vectors and selected with puromycin (1  $\mu$ g/ml) for 2 weeks. (B) Sesn2 silencing with either shSesn2-1 or shSesn2-2 (from A) has similar effect on the sensitivity to TNF $\alpha$ +CHX treatment. Cells were treated with TNF $\alpha$ +CHX for 4 hrs and analyzed by PI staining followed by flow cytometry. (C) Sesn2 silencing inhibits TNF $\alpha$ +CHX induced apoptosis in A549 cells. shSesn2-silenced or control A549 cells were treated with TNF $\alpha$ +CHX for 4 hrs and the levels of apoptotic and necrotic cell death were analyzed by Annexin V-PI staining.

**Figure S2: Sesn2 supports TNF $\alpha$ -induced apoptosis but not staurosporine-induced cell death or TNF $\alpha$ -induced necroptosis.** (A) Sesn2-silencing protects H460 cells from TNF $\alpha$ +Actinomycin D induced cell death. Sesn2-silenced or control H460 cells were treated with TNF $\alpha$ +Actinomycin D for 5 hrs and cell death was evaluated by number of cells with sub-G1 DNA content assessed by flow cytometry (B) Sesn2 does not play any role in the regulation of staurosporine-induced apoptosis. Sesn2-silenced or control H460 cells were treated with staurosporine for the indicated time intervals and analyzed by flow cytometry as in (A). (C) Sesn2 does not contribute to TNF $\alpha$ -induced necroptosis. Sesn2-silenced or control H460 cells were treated with TNF $\alpha$ +CHX in the presence of pan-caspase inhibitor ZVAD-FMK (50  $\mu$ M) and analyzed 24, 48, 72 and 96 hrs after treatment by PI staining followed by flow cytometry.

**Figure S3: Sesn2 does not affect expression of NF- $\kappa$ B regulated genes.** Sesn2-silenced or control H460 cells were treated with TNF $\alpha$  and the expression of the corresponding NF- $\kappa$ B-inducible genes was analyzed by qPCR.

**Figure S4: Sesn2 does not play an important role in regulation of general autophagy in response to TNF $\alpha$ +CHX treatment.** Sesn2-silenced and control H460 cells were treated with TNF $\alpha$ +CHX for 4 hrs and expression of p62 and LC3 proteins were determined by immunoblot analysis.

**Figure S5: Sesn2 is not involved in regulation of XIAP-p62 interactions.** Sesn2-silenced or control H460 cells were lysed and either XIAP or p62 proteins were immunoprecipitated and analyzed by immunoblotting using the indicated antibodies.

## Supplemental Experimental Procedures

### Constructs

The sequence for shSesn2 is 5'-GAAGACCCTACTTTCCGGAT-3', shSesn2-2: 5'-GAGATGGAGAGCCGCTTT-3'. The primers used for qPCR were:: BAX: 5'-TTCCTTACGTGTCTGATCAATCC-3' and 5'-GGGCAGAAGGCGACTAATCAA-3'; Bcl-XL: 5'-TCAGGCTGCTTGGG TAAAG -3' and 5'-AGGCTTCTGGAGGACATTTG-3'; BFL-1/A1: 5'-CACGAAAGTGACTAGGAGGAAG-3' and 5'-CTCACTGAGCTTGACTGAGTTAT-3'; BIM: 5'-CTGCTGGACACACACATACA-3' and 5'-GGGCTGAGGAAACAGAGTAAA-3'; cIAP2 5'-TGCTCGTGCTGGTTTCTATT-3' and 5'-TCAGTAGGACTGTCTCCTCTTT-3'.
